# Supplementary material
Source: ML conference proceedings conference paper supplement (https://www.ecva.net/papers/eccv_2020/papers_ECCV/html/123730664_ECCV_2020_paper.php)
Supplement: Supplementary file 2 [file 123730664-supp.zip]

Archive with 8 entries (8 files):
- animal_giraffe07.mp4
- animal_penguin11.mp4
- human_gymnastics07.mp4
- human_talking06.mp4
- manmade_robot12.mp4
- manmade_truck05.mp4
- README.txt
- 6416-supp.pdf
