# Supplementary material
Source: ML conference proceedings conference paper supplement (https://www.ecva.net/papers/eccv_2020/papers_ECCV/html/123730664_ECCV_2020_paper.php)
Supplement: Supplementary file 2 [file 123730664-supp.zip › README.txt]

This zip archive contains supplemental information for the paper

Matthias Tangemann, Matthias Kümmerer, Thomas S.A. Wallis, Matthias Bethge.
Measuring the Importance of Temporal Featuresin Video Saliency.
In: The European Conference on Computer Vision (ECCV), August 2020.

The pdf file contains additional results announced in the main paper, the
mp4 files show the predictions of the considered video saliency models for
the case studies discussed in the paper (Figures 3 and 4). The video files
are encoded using the H.264 codec.
